# Supplementary material for: High spatial and temporal variability in Antarctic ice discharge linked to ice shelf buttressing and bed geometry
Source: Springer Nature journal article supplement (doi:10.1038/s41598-022-13517-2), 2022-06-29
Supplement: MOESM1 [file 41598_2022_13517_MOESM1_ESM.pdf]

# Northumbria Research Link

Citation: Miles, Bertie W. J., Stokes, Chris R., Jamieson, Stewart S. R., Jordan, Jim, Gudmundsson, Hilmar and Jenkins, Adrian (2022) High spatial and temporal variability in Antarctic ice discharge linked to ice shelf buttressing and bed geometry. Scientific Reports, 12 (1). p. 10968. ISSN 2045-2322

Published by: Nature Publishing

URL: <https://doi.org/10.1038/s41598-022-13517-2> <<https://doi.org/10.1038/s41598-022-13517-2>>

This version was downloaded from Northumbria Research Link:  
<http://nrl.northumbria.ac.uk/id/eprint/49462/>

Northumbria University has developed Northumbria Research Link (NRL) to enable users to access the University's research output. Copyright © and moral rights for items on NRL are retained by the individual author(s) and/or other copyright owners. Single copies of full items can be reproduced, displayed or performed, and given to third parties in any format or medium for personal research or study, educational, or not-for-profit purposes without prior permission or charge, provided the authors, title and full bibliographic details are given, as well as a hyperlink and/or URL to the original metadata page. The content must not be changed in any way. Full items must not be sold commercially in any format or medium without formal permission of the copyright holder. The full policy is available online: <http://nrl.northumbria.ac.uk/policies.html>

This document may differ from the final, published version of the research and has been made available online in accordance with publisher policies. To read and/or cite from the published version of the research, please visit the publisher's website (a subscription may be required.)

## Supplementary Tables and Figures

**Table S1:** List of the ITS\_LIVE and MEaSUREs annual velocity products used in each of the composite mosaics.

| Epoch     | ITS_LIVE                                     | MEaSUREs             |
|-----------|----------------------------------------------|----------------------|
| 1999-2002 | 1999, 2000, 2001, 2002                       |                      |
| 2003-2006 | 2003, 2004, 2005, 2006                       |                      |
| 1999-2006 | 1999,2000, 2001,2002, 2003, 2004, 2005, 2006 | 2005-2006            |
| 2007-2008 | 2007, 2008                                   | 2006-2007, 2007-2008 |
| 2009-2010 | 2009, 2010                                   | 2008-2009, 2009-2010 |
| 2011-2012 | 2011, 2012                                   | 2010-2011, 2011-2012 |
| 2013      | 2013                                         | 2013-2014            |
| 2014      | 2014                                         | 2014-2015            |
| 2015      | 2015                                         | 2015-2015            |
| 2016      | 2016                                         | 2016-2017            |
| 2017      | 2017                                         |                      |
| 2018      | 2018                                         |                      |

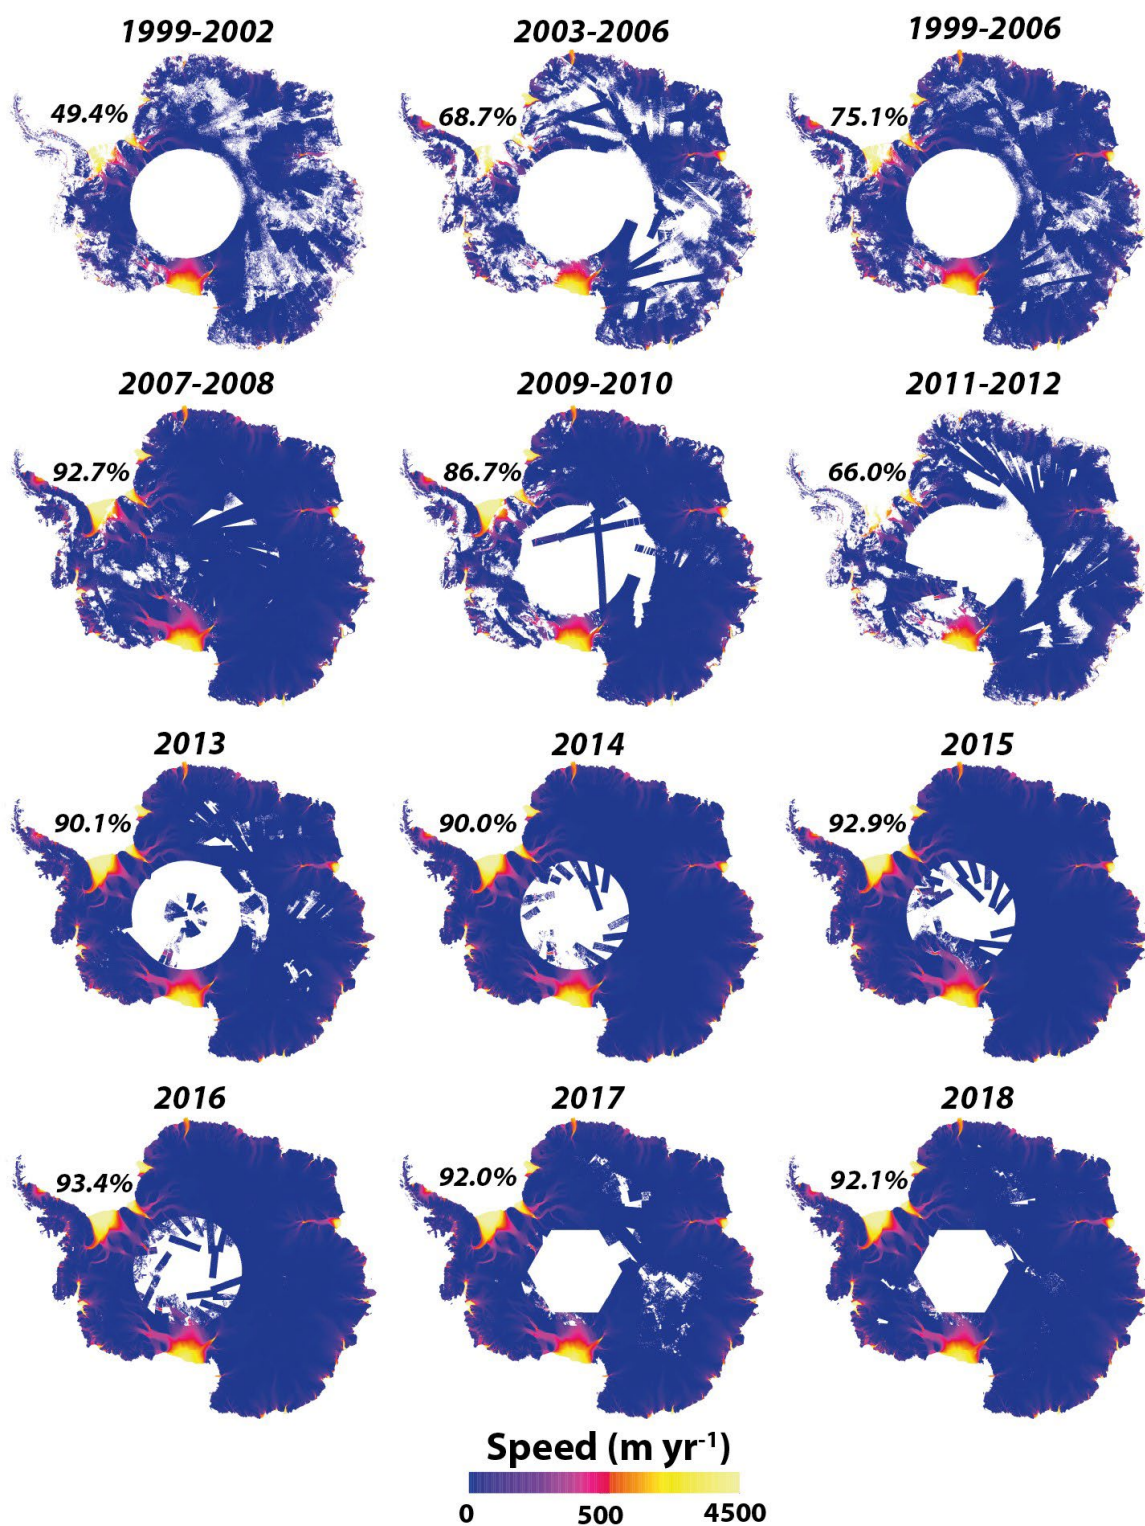

**Figure S1:** Spatial coverage of each mosaic composite used in our timeseries. The percentage on the top left of each mosaic represents the percentage coverage of ice discharge relevant to the MEaSURES v2 (Rignot et al., 2011) ice velocity mosaic, which we used as a reference dataset.

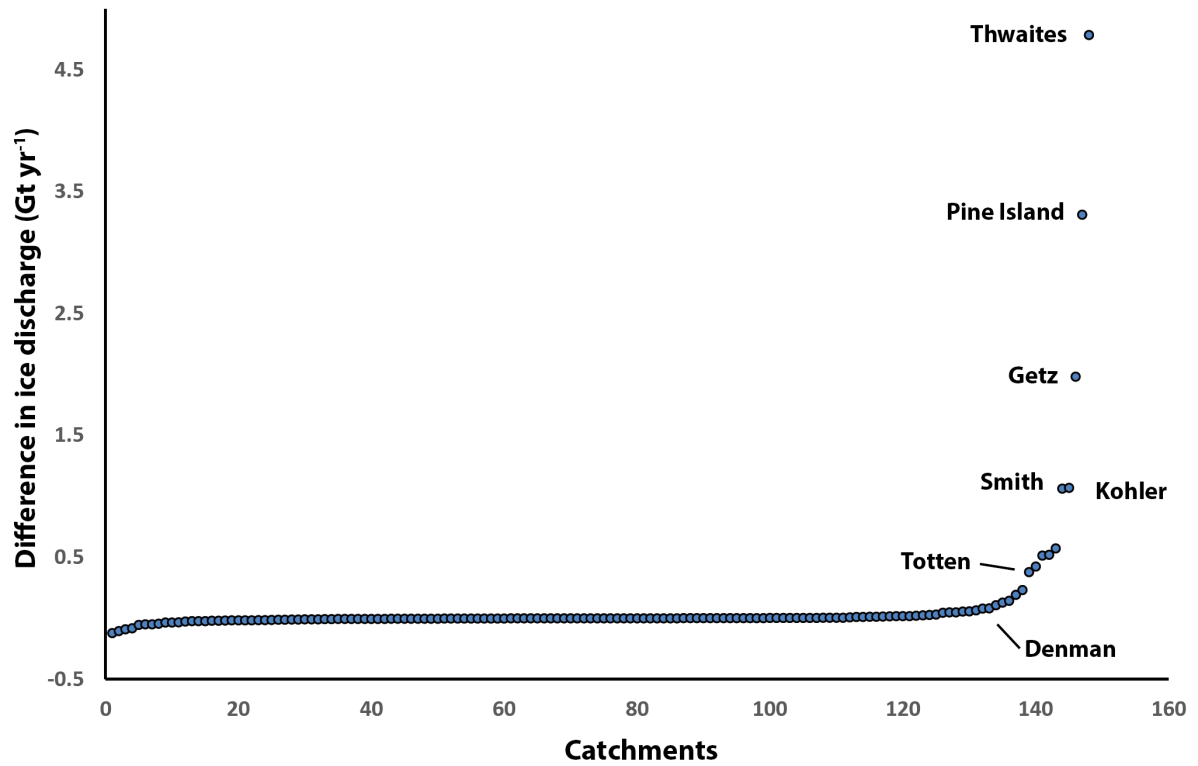

**Figure S2:** Difference in 2018 ice discharge between constant ice thickness and correcting ice thickness based on observed change between 2002 and 2018 for each glacier catchment. Catchments are ordered from minimum to maximum difference and selected catchments are labelled.

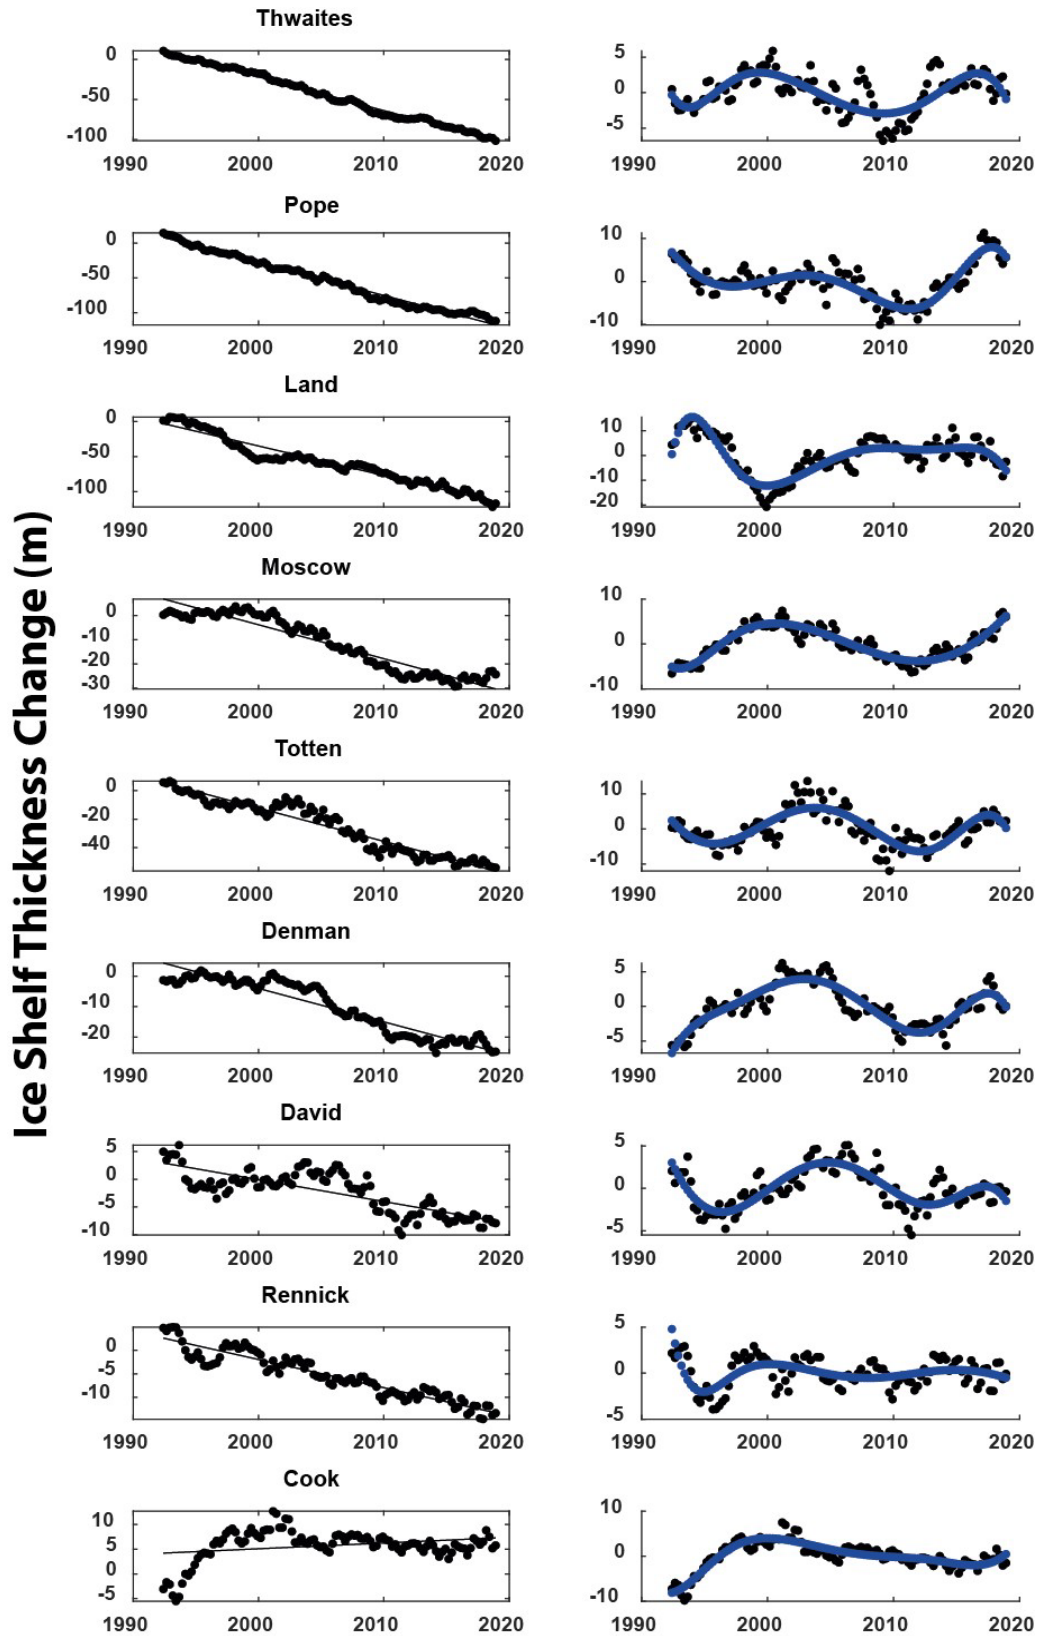

**Figure S3:** Ice shelf thickness change for the nine examples used in Figure 4. The left column represents the raw ice shelf thickness change data from Adusumilli et al. (2020). The column on the right is the linearly detrended anomalies (black dots) in ice shelf thickness change, fitted with a cubic spline (blue). The cubic spline is the data presented in Figure 4.



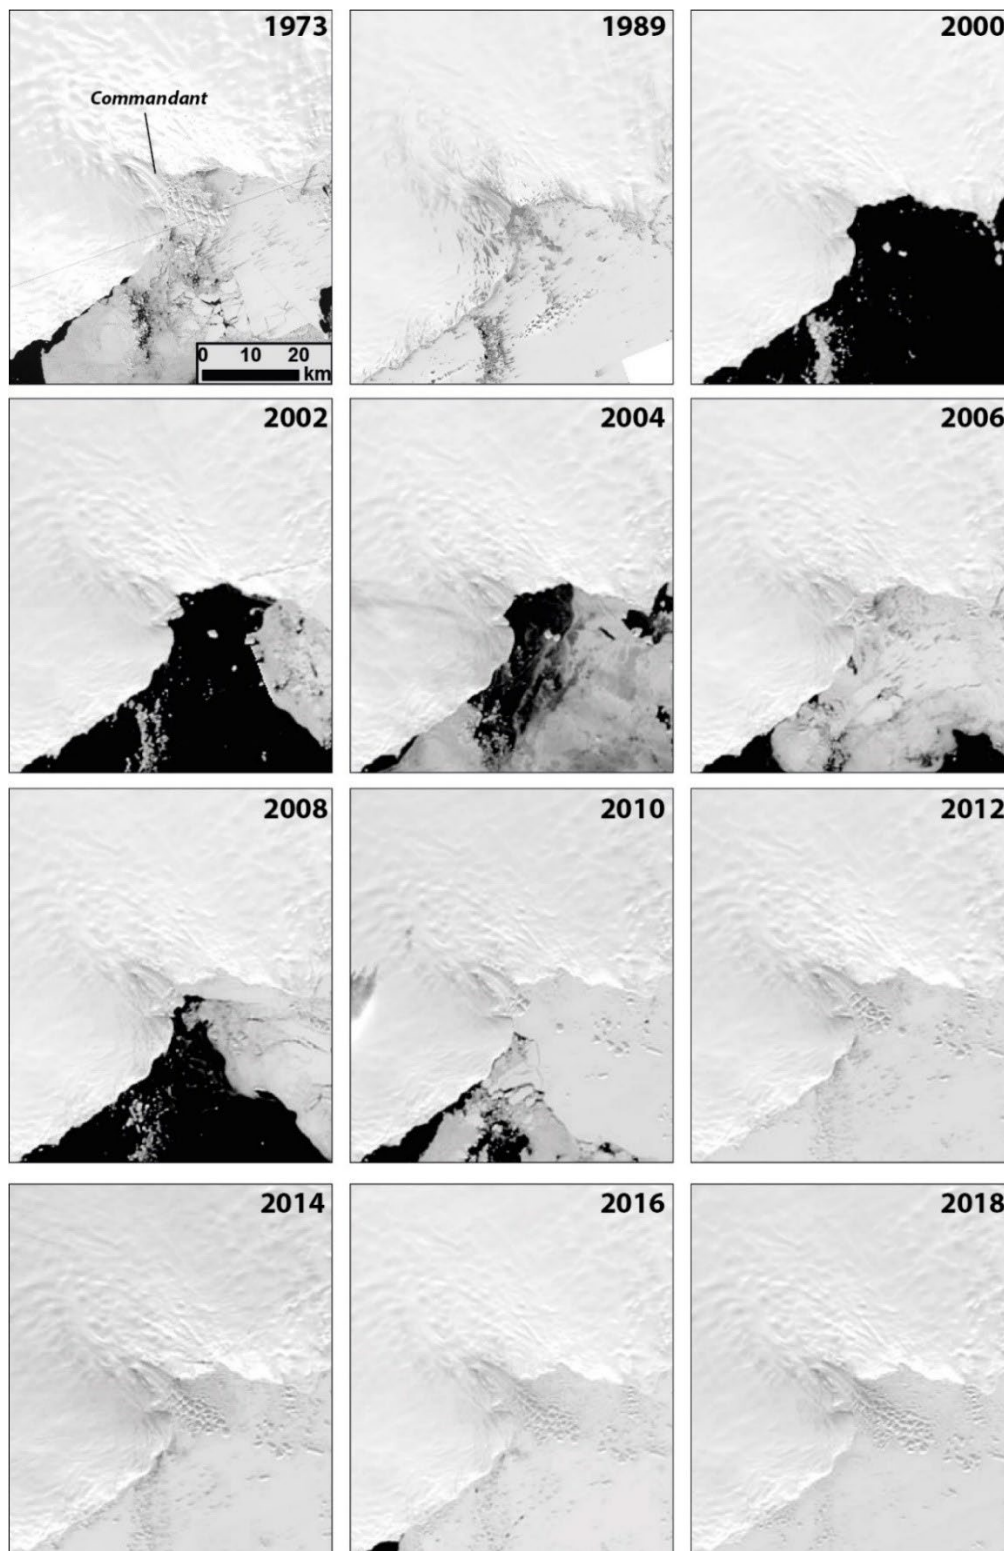

**Figure S4:** Satellite imagery of the Commandant Glacier. The 1973 and 1989 images are from Landsat-1 and Landsat-5 respectively. Images from 2000-2018 are MODIS images taken in March. The extent of the Commandant ice tongue in 2018 is the most extensive throughout the satellite record. Note from 2010 onwards the landfast sea-ice has remained present in each image.

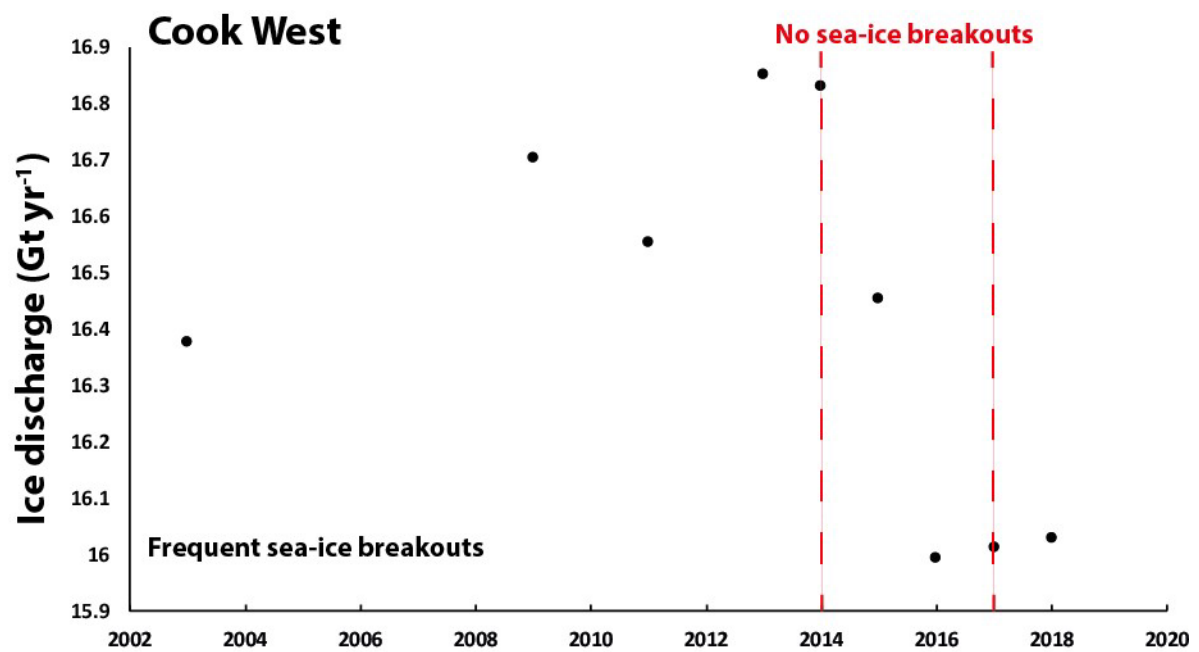

**Figure S5:** Timeseries of ice discharge from the Cook West Glacier. Note the decrease in ice discharge between 2014 and 2016 when landfast sea-ice remained fastened to the ice-front and prompted ice-front advance (see Miles et al., 2018).
